# Supplementary material
Source: publisher site journal article supplement (https://www.dovepress.com/article/269251)
Supplement: Supplementary file 1 [file get_supplementary_file.php]

**Table S1: Phenotypical characteristics of investigated probands**

|     | Sex | BMI (kg/m <sup>2</sup> ) | Age at the last examination (years) | Age at diabetes onset (years) | Diabetes duration (years) | Parent with diabetes ** | GADA/IA2A (IU/ml) | Fasting C-peptide* (nmol/l) | HLA DRB1* Genotype | Circumstances of diagnosis                 | Treatment*            | FPG* (mmol/l); HbA1c* (%); HbA1c* (mmol/mol) | FPG# (mmol/l); HbA1c# (%); HbA1c# (mmol/mol) | Identified variant                          |
|-----|-----|--------------------------|-------------------------------------|-------------------------------|---------------------------|-------------------------|-------------------|-----------------------------|--------------------|--------------------------------------------|-----------------------|----------------------------------------------|----------------------------------------------|---------------------------------------------|
| P1  | M   | 21.8                     | 30                                  | 21                            | 9                         | 1                       | Neg/Neg           | 0.35                        | DR3/DR13           | Polyuria, ketosis, weight loss, fatigue    | Insulin + OHO         | 15.82; 12.8; 116.4                           | NA; NA; NA                                   | None                                        |
| P3  | M   | 23.3                     | 32                                  | 26                            | 6                         | 2                       | Neg/Neg           | 0.58                        | DR3/DR13           | Polyuria, ketosis, weight loss             | Insulin               | 4.78; 5.3; 34.4                              | NA; NA; NA                                   | None                                        |
| P4  | M   | 22.8                     | 29                                  | 24                            | 5                         | NA                      | Neg/Neg           | 0.34                        | DR3/DR13           | Incidentally                               | OHA                   | 7.67; 6.9; 51.9                              | 7.11; NA; NA                                 | GCK: Met210Lys/WT                           |
| P5  | M   | 20.4                     | 27                                  | 27                            | 0.5                       | 1                       | NA                | NA                          | DR7/DR11           | Polyuria, polydipsia, weight loss, fatigue | Insulin               | 7.61; NA; NA##                               | 11.11; 11.0; 96.7                            | None                                        |
| P6  | F   | 24.2                     | 28                                  | 19                            | 9                         | 1                       | NA                | 0.34                        | DR4/DR15           | Incidentally                               | Insulin (0.16 U/Kg/d) | 5.89; 6.9; 51.9                              | NA; NA; NA                                   | None                                        |
| P10 | M   | 24.7                     | 37                                  | 27                            | 10                        | 1                       | Neg/NA            | 1                           | DR11/DR11          | Polyuria, ketosis, polydipsia              | Insulin+OHA           | 9.11; 7.1; 54.1                              | NA; NA                                       | None                                        |
| P12 | M   | 18                       | 18                                  | 9                             | 9                         | 1                       | Neg/NA            | 0.45                        | DR11/DR16          | Hospital admission                         | None                  | 4.83; 5.5; 36.6                              | NA; 7.0; 53.0                                | GCK: Gly261Arg/WT                           |
| P13 | M   | 18.4                     | 30                                  | 27                            | 3                         | 1                       | Neg/NA            | 0.21                        | DR3/DR4            | Polyuria, polydipsia, ketosis, weight loss | Insulin               | NA; 5.4; 35.5                                | NA; NA; NA                                   | HNF1A : Thr156Met/WT<br>HNF1B : Gly76Cys/WT |

BMI: Body Mass Index, M: Male, F: Female, Neg: Negative, NA: Not available.

\*At the last examination (see above text). \*\*1: father or mother; \*\*2: both father and the mother are affected. # At diagnosis. ## with massive glycosuria.

**Figure S1:** Pedigrees of the families 1, 3, 5, 6 and 10 where no pathogenic variants were identified.

**Figure S1.** Pedigrees of the families 1, 3, 5, 6 and 10 where no pathogenic variants were identified.

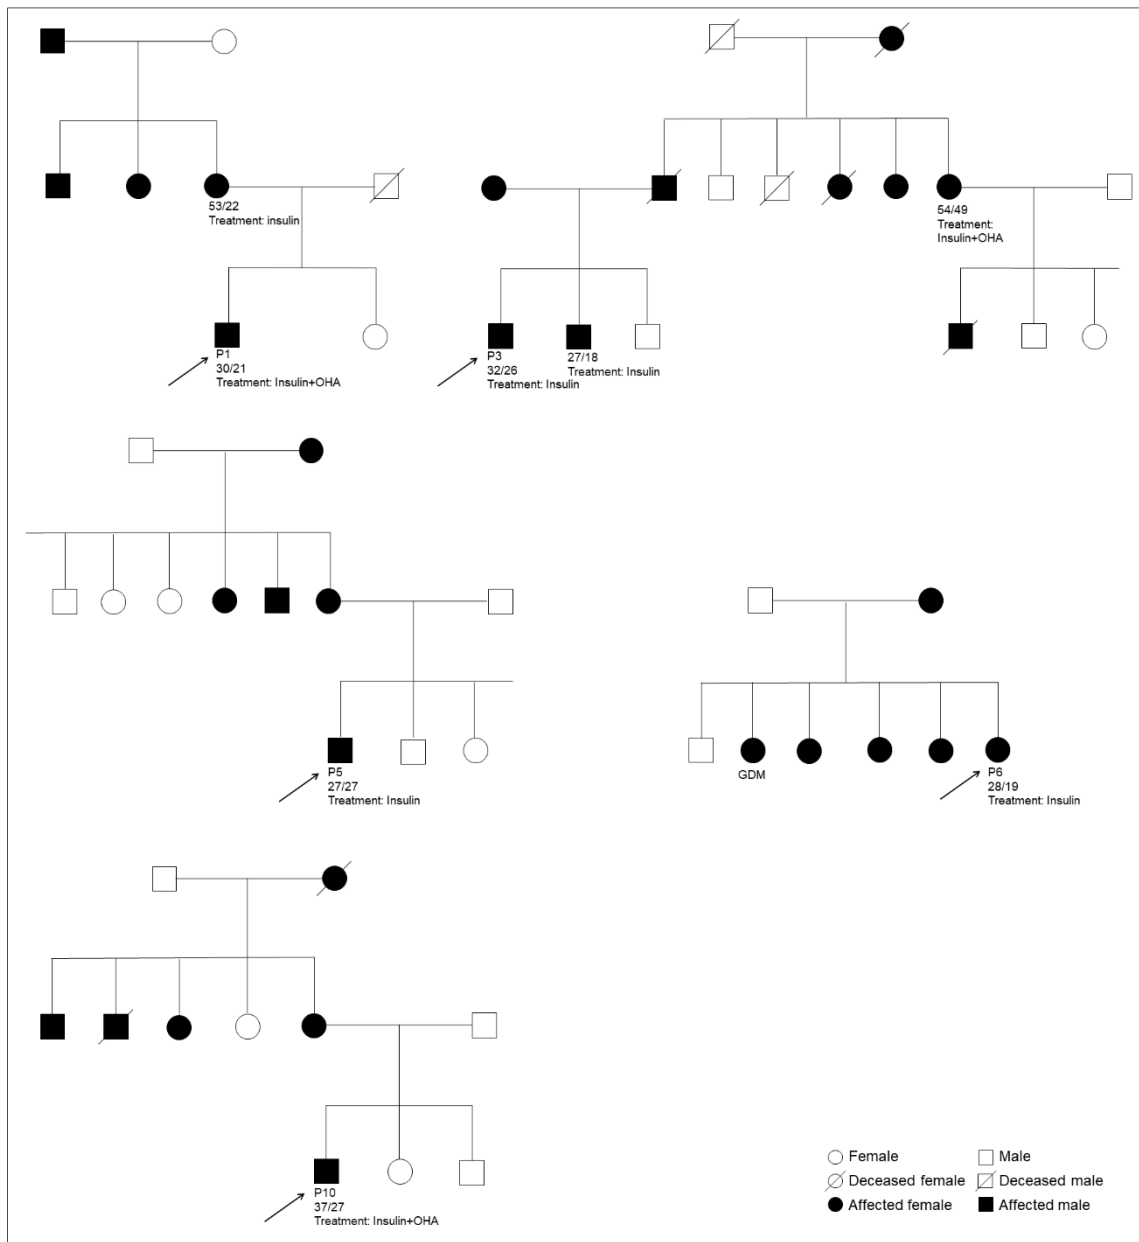

Arrows indicate the proband. Numbers below the proband refer to line 1: the proband number, line 2: age of examination/age of diagnosis, line 3: treatment receive. Lines extending beyond the side of the pedigree indicates additional siblings without any available DNA or clinical information.
